# Supplementary material for: Copper-binding energetics of amicyanin in different folding states
Source: Royal Society of Chemistry journal article supplement (doi:10.1039/c9mt00261h), 2019-12-03
Supplement: c9mt00261h1.pdf [file c9mt00261h1.pdf]

**Table S1.** Thermodynamic parameters for copper binding to buffers and holo-amicyanin possessing 6×His tag

|                           | 0.25 M ammonium acetate buffer | 6×His-tagged amicyanin<br>in 0.25 M ammonium acetate |
|---------------------------|--------------------------------|------------------------------------------------------|
| <i>N</i> (site)           | 0.8 ± 174.0                    | 0.1 ± 1.3                                            |
| <i>K<sub>D</sub></i> (μM) | 570 ± 8260                     | 36 ± 26                                              |
| Δ <i>H</i> (kJ/mol)       | -335 ± 7900                    | -335 ± 4360                                          |
| Δ <i>G</i> (kJ/mol)       | -18.5                          | -25.4                                                |

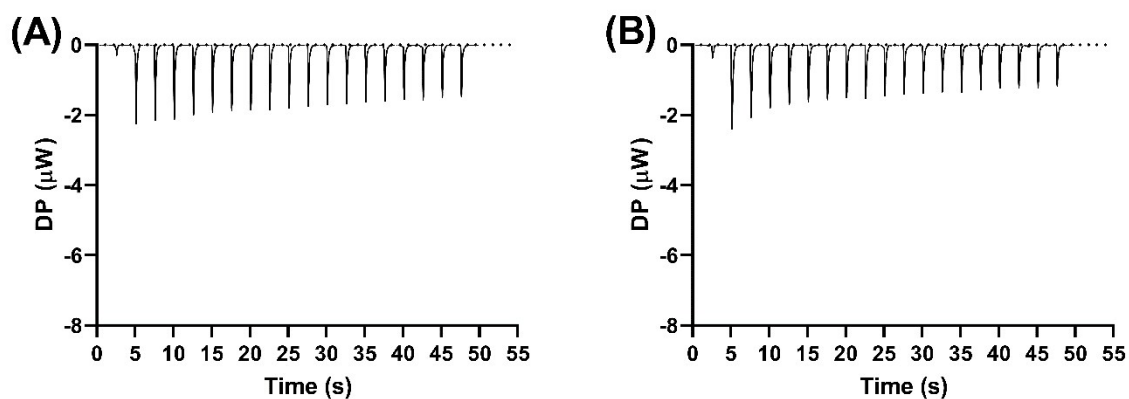

**Figure S1.** Thermodynamic analysis following the addition of copper to the buffers and holo-amicyanin possessing 6×His tag. (A) Isothermal calorimetry (ITC) curves measured at 25°C for copper added to 0.25 M ammonium acetate buffer (pH 8.0) are shown. Heat compensation in the reaction cell containing amicyanins as a function of time was best fitted by a single binding site model. (B) ITC curves measured at 25°C for copper added to 12  $\mu$ M holo-amicyanin in 0.25 M ammonium acetate buffer (pH 8.0) are shown. Heat compensation in the reaction cell containing amicyanins as a function of time was best fitted by a single binding site model.
